# Supplementary material for: An expanded database of Southern Hemisphere surface sediment dinoflagellate cyst assemblages and their oceanographic affinities
Source: Copernicus journal article supplement (doi:10.5194/jm-42-35-2023), 2023-06-02
Supplement: Supplementary file 1 [file jm-42-35-2023-supplement.pdf]

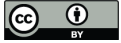

*Supplement of*

## **An expanded database of Southern Hemisphere surface sediment dinoflagellate cyst assemblages and their oceanographic affinities**

**Lena Mareike Thöle et al.**

*Correspondence to:* Peter Kristian Bijl ([p.k.bijl@uu.nl](mailto:p.k.bijl@uu.nl))

The copyright of individual parts of the supplement might differ from the article licence.

## Supplementary Material

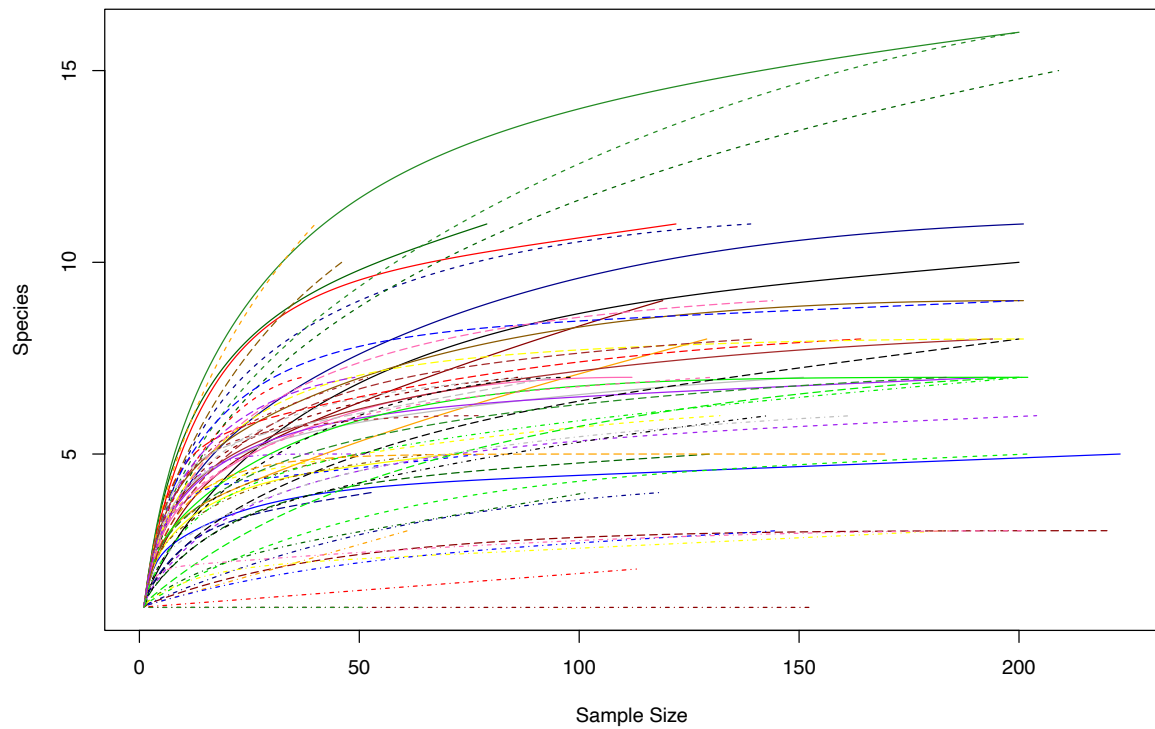

**Figure S1. Rarefaction on dinocyst counts of the new samples.**

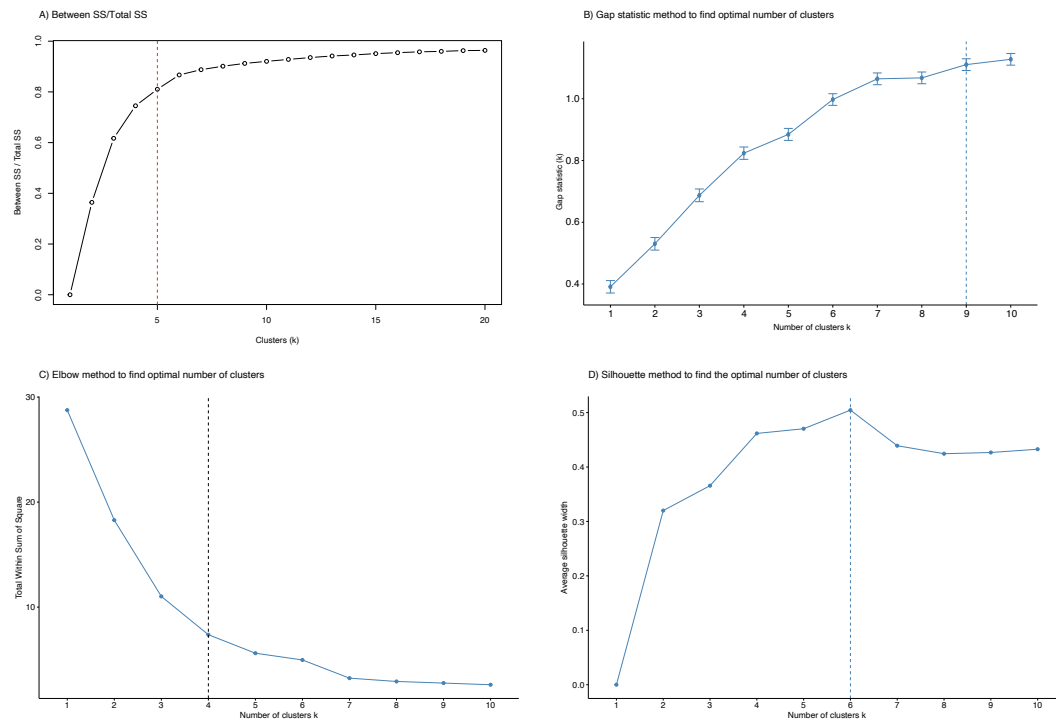

**Fig. S2. Various methods to define the optimal clustering for dinocyst data in wsi\_100.**

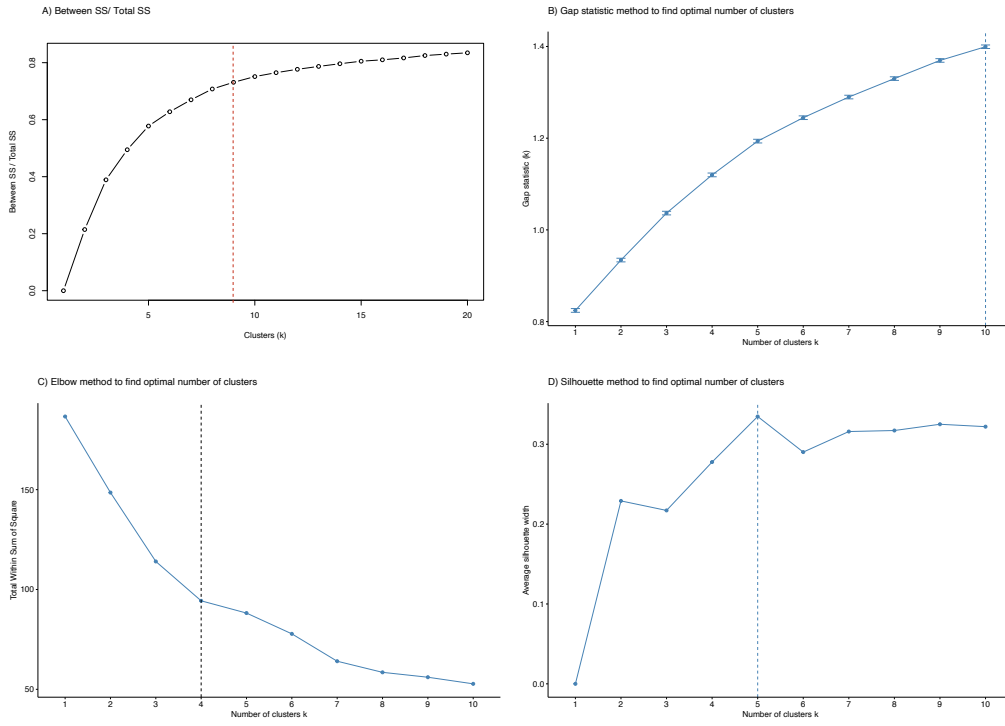

**Fig. S3 Various methods to determine the optimal clustering of the dinocyst data in sh\_655.**
